# Supplementary material
Source: PubMed Central journal article supplement (PMC3557458)

## Supplementary Material

### Supplementary Figure Legends

**Figure S1.** Thermal melting curves for Bcl-x<sub>L</sub> and RX1 monitored by mean residue ellipticity at 222 nm. Experimental conditions are described in Materials and Methods.

**Figure S2.** Fluorescence polarization experiments and fitted curves characterizing binding of Bcl-x<sub>L</sub> and RX1 to fluorescently labeled Bim or Bad BH3 peptides. The different dye-labeled peptides used are indicated on each plot and described in Table S3. The average values as well as the standard deviation of two independent measurements of anisotropy are plotted as a function of Bcl-x<sub>L</sub>/RX1 concentration. Fitted values are listed in Table S4. Experimental conditions and curve fitting for the direct binding experiments are described in Materials and Methods.

**Figure S3.** Fluorescence polarization experiments and fitted curves characterizing binding of Bcl-x<sub>L</sub> and RX1 point mutants to fluorescently labeled Bad BH3 peptides, presented as in Figure S2.

**Figure S4.** Fluorescence polarization experiments and fitted curves characterizing binding of Bcl-x<sub>L</sub>, RX1 and different Bcl-x<sub>L</sub> point mutants to unlabeled Bim-22 (open diamond) or Bad-22 (closed circle) peptides by competition. The Bcl-x<sub>L</sub> variant, the competitor peptide, and the fluorescently labeled peptide being competed off are indicated on each plot. The average values as well as the standard deviation of two independent measurements are plotted as a function of competitor peptide concentration. Fitted values are listed in Table S6. Experimental conditions and curve fitting for these competition experiments are described in Materials and Methods.

**Figure S5.** Fluorescence polarization experiments and fitted curves characterizing binding of different RX1 point mutants to unlabeled Bim-28 (open diamond) or Bad-28/Bad-22 (closed circle) peptides by competition, presented as in Figure S4. Fitted values are listed in Table S7.

**Figure S6.** The influence of point mutations in RX1 on binding to Bim or Bad BH3, using the Bim-26 and Bad-26 (for RX1 mutants L105F, I122S, V125Q, G142A) or Bad-22 (for RX1 mutants H101Y, G111Q, A126V, I130L, A146F) peptides. (A) Fluorescence polarization experiments and fitted curves characterizing binding of Bcl-x<sub>L</sub>, RX1 and different RX1 point mutants to unlabeled Bim-26 (open diamond) or Bad-26/Bad-22 (closed circle) peptides by competition, presented as in Figure S4. Fitted values are listed in Table S7. (B) Ratios of the  $K_i$  values for Bcl-x<sub>L</sub> point mutants binding Bim (white) or Bad (gray) to the  $K_i$  values for Bcl-x<sub>L</sub> binding the same BH3 peptide are shown. Peptide sequences are given in Table S3.

**Figure S7.** Fluorescence polarization experiments and fitted curves characterizing binding of Bcl-x<sub>L</sub> (open diamond), RX1 (closed circle) to unlabeled Bad mutant peptides by competition. The fBad-23 peptide was competed off in all experiments. The competitor peptide is indicated on each plot. The average values as well as the standard deviation of two independent measurements are plotted as a function of competitor peptide concentration. Fitted  $K_i$  values for Bcl-x<sub>L</sub> and RX1 interacting with different BH3 peptides are listed in Table S8. Experimental conditions and curve fitting for these competition experiments are described in Materials and Methods.

**Figure S8.** Sites of mutations modeled on crystal structures of the Bcl-x<sub>L</sub>/Bad complex (PDB ID: 2BZW). (A) The interface between Bcl-x<sub>L</sub> and a Bad BH3 peptide (PDB ID: 2BZW), with Bcl-x<sub>L</sub> in cyan and the peptide shown as green sticks. Positions mutated in RX1 are in blue. (B) Interaction between A142 of Bcl-x<sub>L</sub> and S3e of Bad, as shown in the crystal structure between mouse Bcl-x<sub>L</sub> (cyan) and Bad (green) (PDB ID: 2BZW). In RX1, A142 was mutated to Gly. The 3e position is occupied by Gly for Bim, and Ala for PUMA. (C) Possible coupling between F146 and the  $\alpha$ 3 helix of Bcl-x<sub>L</sub> through Y2d of Bad. Structural alignment of Bcl-x<sub>L</sub>/Bad (PDB ID: 2BZW, shown in magenta) and Bcl-x<sub>L</sub>/Bim (PDB ID: 3FDL, shown in yellow) illustrate the different conformations of the  $\alpha$ 3 helices in the two structures. Images generated using PyMol (Delano Scientific).

## Supplementary Tables

**Table S1. Unique sequences isolated from the first designed library**

|           | <b>F97</b> | <b>Y101</b>    | <b>A104</b> | <b>L108</b> | <b>L112</b> | <b>V126</b> | <b>E129</b> | <b>L130</b> | <b>A142</b> | <b>Other<sup>b</sup></b> | <b>#<sup>c</sup></b> |
|-----------|------------|----------------|-------------|-------------|-------------|-------------|-------------|-------------|-------------|--------------------------|----------------------|
| <b>A2</b> | F          | H <sup>a</sup> | W           | R           | L           | V           | I           | I           | G           |                          | 1                    |
| <b>A3</b> | F          | Y              | A           | L           | M           | A           | V           | L           | G           |                          | 1                    |
| <b>A4</b> | F          | H              | F           | A           | L           | A           | A           | L           | G           |                          | 1                    |
| <b>B2</b> | F          | H              | F           | T           | L           | V           | T           | I           | G           | Q111K                    | 7                    |
| <b>B4</b> | F          | Y              | A           | V           | V           | A           | E           | V           | G           |                          | 1                    |
| <b>B5</b> | F          | Y              | M           | L           | L           | A           | V           | L           | G           |                          | 1                    |
| <b>C1</b> | F          | Y              | M           | V           | L           | A           | E           | I           | G           |                          | 1                    |
| <b>C3</b> | F          | H              | W           | S           | L           | V           | T           | I           | G           |                          | 1                    |
| <b>C4</b> | F          | H              | F           | T           | L           | V           | V           | I           | G           |                          | 1                    |
| <b>C5</b> | F          | H              | K           | L           | L           | A           | I           | L           | G           | S122I                    | 1                    |
| <b>C6</b> | L          | H              | F           | R           | L           | V           | T           | I           | G           |                          | 1                    |
| <b>D3</b> | F          | H              | A           | L           | L           | T           | V           | L           | G           |                          | 1                    |
| <b>D5</b> | F          | H              | W           | R           | L           | I           | E           | I           | G           |                          | 1                    |
| <b>D6</b> | F          | H              | F           | T           | L           | V           | T           | I           | G           |                          | 1                    |
| <b>E2</b> | F          | Y              | M           | V           | L           | S           | E           | I           | G           |                          | 1                    |
| <b>E5</b> | F          | H              | W           | R           | L           | I           | T           | I           | G           |                          | 2                    |
| <b>F4</b> | F          | Y              | A           | V           | L           | A           | E           | I           | G           |                          | 1                    |
| <b>G3</b> | F          | H              | F           | R           | L           | T           | V           | L           | G           |                          | 1                    |
| <b>G5</b> | F          | H              | F           | T           | L           | A           | E           | L           | G           |                          | 1                    |
| <b>H3</b> | F          | H              | W           | R           | L           | A           | E           | L           | G           |                          | 1                    |
| <b>H6</b> | F          | H              | M           | T           | L           | V           | V           | L           | G           | R103W                    | 1                    |

<sup>a</sup> Shaded mutations were either not included in the modeling or not predicted as “non-disruptive” residues, but were included in the library due to degenerate codons.

<sup>b</sup> Mutations under the “other” column were not included in the library design.

<sup>c</sup> Number of clones recovered with this sequence.

**Table S2. Unique sequences of specific binders isolated from the second designed library after two sorts <sup>a</sup>**

|    | E96 | Y101 | A104 | L108 | Q111     | S122 | Q125 | V126 | E129 | L130 | F146 | Y195 | Other | # <sup>b</sup> |
|----|-----|------|------|------|----------|------|------|------|------|------|------|------|-------|----------------|
| A1 | Q   | H    | M    | L    | D        | V    | V    | V    | E    | I    | A    | Y    |       | 1              |
| A3 | L   | H    | A    | L    | G        | I    | I    | A    | E    | L    | A    | Y    |       | 1              |
| A4 | Q   | H    | A    | L    | E        | V    | I    | A    | V    | L    | A    | F    |       | 1              |
| A5 | L   | H    | A    | L    | S        | L    | I    | A    | E    | L    | A    | Y    |       | 1              |
| B1 | L   | H    | M    | L    | E        | F    | I    | A    | E    | L    | A    | Y    |       | 1              |
| B3 | Q   | H    | A    | L    | T        | I    | L    | A    | E    | L    | A    | Y    |       | 1              |
| B4 | Q   | H    | A    | L    | S        | V    | I    | V    | E    | I    | A    | Y    |       | 1              |
| B6 | R   | H    | A    | L    | S        | V    | T    | A    | E    | L    | A    | Y    |       | 1              |
| C2 | V   | H    | A    | L    | T        | I    | I    | A    | E    | L    | A    | Y    |       | 1              |
| C6 | V   | H    | A    | L    | Q        | I    | E    | A    | E    | L    | A    | Y    |       | 1              |
| D2 | Q   | H    | A    | L    | D        | V    | V    | V    | E    | I    | A    | Y    |       | 2              |
| D4 | Q   | H    | A    | L    | D        | I    | I    | V    | E    | I    | A    | Y    | A85T  | 1              |
| D5 | G   | H    | A    | L    | S        | V    | V    | A    | E    | L    | A    | Y    |       | 1              |
| E2 | L   | H    | A    | L    | <b>P</b> | I    | I    | V    | E    | I    | A    | Y    | F105I | 1              |
| E3 | G   | H    | A    | L    | E        | V    | I    | A    | V    | L    | A    | F    |       | 1              |
| E4 | Q   | Y    | M    | L    | E        | I    | I    | A    | E    | I    | A    | Y    |       | 1              |
| E6 | Q   | H    | A    | L    | L        | F    | I    | A    | E    | I    | A    | Y    |       | 1              |
| F1 | L   | H    | A    | L    | Q        | I    | V    | V    | E    | I    | A    | Y    |       | 1              |
| F2 | E   | H    | M    | L    | E        | V    | I    | V    | E    | I    | A    | Y    |       | 1              |
| F3 | R   | H    | A    | L    | T        | T    | I    | A    | E    | L    | A    | Y    |       | 1              |
| F4 | R   | H    | A    | L    | H        | V    | V    | A    | E    | L    | A    | Y    |       | 2              |
| F5 | L   | H    | A    | L    | S        | I    | E    | A    | E    | L    | A    | Y    |       | 1              |
| G2 | L   | H    | A    | L    | D        | T    | E    | A    | E    | L    | A    | Y    | F105L | 1              |
| G3 | L   | H    | M    | L    | E        | F    | I    | A    | E    | L    | A    | Y    |       | 1              |
| G5 | Q   | H    | M    | L    | D        | T    | A    | A    | E    | L    | A    | Y    | F105L | 1              |
| G6 | L   | H    | A    | L    | G        | L    | I    | A    | E    | L    | A    | Y    |       | 1              |
| H3 | Q   | H    | M    | L    | N        | I    | V    | A    | E    | L    | A    | Y    |       | 1              |
| H5 | Q   | H    | M    | L    | N        | I    | I    | A    | E    | L    | A    | Y    |       | 1              |

<sup>a</sup> See descriptions for Table S1. The shaded Pro is the only mutation that was not predicted as non-disruptive. Note that, relative to Bcl-x<sub>L</sub>, all variants also had mutation A142G, identified in library 1 screening.

<sup>b</sup> Number of clones recovered with this sequence.

**Table S3. BH3 peptides used in this study**

|                              | 2-----3-----4-----<br>efgabcde f gabcde f gabcde f gab | Origin <sup>a</sup> |
|------------------------------|--------------------------------------------------------|---------------------|
| <b>Bim-28</b>                | MRPEIWIAQELRRIGDEFNAYYARRVFL                           | recombinant         |
| <b>Bad-28</b>                | LWAAQRYGRELRRMSDEFVDSFKKGLPR                           | recombinant         |
| <b>Bim-26</b>                | MRPEIWIAQELRRIGDEFNAYYARRV                             | synthetic           |
| <b>Bad-26</b>                | LWAAQRYGRELRRMSDEFVDSFKKGL                             | synthetic           |
| <b>Bim-22</b>                | MRPEIWIAQELRRIGDEFNAYY                                 | synthetic           |
| <b>Bad-22</b>                | LWAAQRYGRELRRMSDEFVDSF                                 | synthetic           |
| <b>Bad-22-G2eL</b>           | LWAAQRYLRELRRMSDEFVDSF                                 | synthetic           |
| <b>Bad-22-L3aD</b>           | LWAAQRYGREDRRMSDEFVDSF                                 | synthetic           |
| <b>Bad-22-S3eL</b>           | LWAAQRYGRELRRMLDEFVDSF                                 | synthetic           |
| <b>Bad-22-D3fK</b>           | LWAAQRYGRELRRMSKEFVDSF                                 | synthetic           |
| <b>Bad-22-F4aE</b>           | LWAAQRYGRELRRMSDEEVDSF                                 | synthetic           |
| <b>Bak</b>                   | SSTMGQVGRQLAIIIGDDINRRYDSEFQT                          | recombinant         |
| <b>Bax</b>                   | DASTKKLSECLKRIGDELDSNMELQRFMI                          | recombinant         |
| <b>Beclin</b>                | GGTMENLSRRLKVTGDLFDIMSGQTDVD                           | recombinant         |
| <b>Bid</b>                   | EDIIRNIARHLAQVGDSDMRSLPPGLVN                           | recombinant         |
| <b>Bik</b>                   | MEGSDALALRLACIGDEMVSRLRAPRLA                           | recombinant         |
| <b>Bmf</b>                   | HQAEVQIARKLQCIADQFHLRLHVQQHQ                           | recombinant         |
| <b>Hrk</b>                   | SSAAQLTAARLKALGDELHQRTMWRRRA                           | recombinant         |
| <b>Mule</b>                  | GVMTQEVGQLLQDMGDDVYQQYRSLTRQ                           | recombinant         |
| <b>Noxa</b>                  | AELEVECATQLRRFGDKLNFRQKLLNLI                           | recombinant         |
| <b>Puma</b>                  | EQWAREIGAQLRRMADDLNAQYERRRQE                           | recombinant         |
| <b>fBad-21<sup>b,c</sup></b> | NLWAAQRYGRELRRMSD <u>K</u> FVD                         | synthetic           |
| <b>fBad-23<sup>b</sup></b>   | F1-NLWAAQRYGRELRRMSDEFVDSF                             | synthetic           |
| <b>fBad-27<sup>b</sup></b>   | F1-NLWAAQRYGRELRRMSDEFVDSFKKGL                         | synthetic           |
| <b>fBim-27<sup>b</sup></b>   | F1-DMRPEIWIAQELRRIGDEFNAYYARRV                         | synthetic           |

-

<sup>a</sup>Recombinant peptides all have an N-terminal His tag followed by a 12-residue long linker, and a C-terminal Flag tag preceded by a GlyGly 2-residue long linker. The complete sequence for a recombinant BH3 peptide is: SHHHHHHGESKEYKKGSGS-BH3 peptide-GGDYKDDDDK.

<sup>b</sup>F1 stands for FITC.

<sup>c</sup>The FITC label is on the underlined Lys residue

**Table S4. Fitted  $K_d$  values for direct binding experiments between Bcl-x<sub>L</sub> variants and different fluorescently labeled peptides (fitted curves shown in Fig. S3, S4). Methods for obtaining the average and standard deviation for each  $K_d$  value are described in Materials and Methods.**

|                          | <b>Labeled peptide</b> | <b><math>K_d</math> (nM)</b> |
|--------------------------|------------------------|------------------------------|
| <b>Bcl-x<sub>L</sub></b> | fBad-23                | 3.3±0.4                      |
|                          | fBim-27                | < 1                          |
|                          | fBad-27                | < 1                          |
| <b>RX1</b>               | fBad-23                | 22±4                         |
|                          | fBim-27                | 3,800±400                    |
|                          | fBad-27                | 1.7±0.2                      |
| <b>Y101H</b>             | fBad-23                | 23±5                         |
| <b>A104M</b>             | fBad-21                | 3.8±0.5                      |
| <b>F105L</b>             | fBad-23                | 8.9±3.5                      |
| <b>Q111G</b>             | fBad-23                | 6.4±2.0                      |
| <b>S122I</b>             | fBad-21                | 4.2±0.1                      |
| <b>Q125V</b>             | fBad-21                | 4.7±2.0                      |
| <b>V126A</b>             | fBad-23                | 16±3                         |
| <b>L130I</b>             | fBad-23                | 31±3                         |
| <b>A142G</b>             | fBad-21                | 1.6±0.3                      |
| <b>F146A</b>             | fBad-23                | 63±14                        |
| <b>RX1-H101Y</b>         | fBad-23                | 2.9±0.7                      |
| <b>RX1-L105F</b>         | fBad-27                | 6.8±1.6                      |
| <b>RX1-G111Q</b>         | fBad-23                | 13±1                         |
| <b>RX1-I122S</b>         | fBad-27                | 40±8                         |
| <b>RX1-V125Q</b>         | fBad-27                | 17±5                         |
| <b>RX1-A126V</b>         | fBad-23                | 17±3                         |
| <b>RX1-I130L</b>         | fBad-23                | 3.6±0.4                      |
| <b>RX1-G142A</b>         | fBad-27                | 35±8                         |
| <b>RX1-A146F</b>         | fBad-23                | 21±1                         |

**Table S5. Fitted  $K_i$  values (nM) for Bcl-x<sub>L</sub> and RX1 interacting with different BH3 peptides. Methods for obtaining the average and standard deviation for each  $K_i$  value are described in Materials and Methods.**

|               | <b>Bcl-x<sub>L</sub></b> | <b>RX1</b> |
|---------------|--------------------------|------------|
| <b>Bad-28</b> | <0.1                     | 0.26±0.07  |
| <b>Bim-28</b> | <0.1                     | 2,300±400  |
| <b>PUMA</b>   | <0.1                     | 35±8       |
| <b>Bid</b>    | 34±5                     | >20,000    |
| <b>Bak</b>    | 11±3                     | >20,000    |
| <b>Bax</b>    | 200±30                   | >20,000    |
| <b>Bmf</b>    | 0.25±0.15                | >20,000    |
| <b>Bik</b>    | 26±7                     | >20,000    |
| <b>Hrk</b>    | 0.17±0.05                | >20,000    |
| <b>Beclin</b> | >1,000                   | >20,000    |
| <b>MULE</b>   | >1,000                   | >20,000    |
| <b>Noxa</b>   | >1,000                   | >20,000    |



**Table S6. Fitted  $K_i$  values (nM) for point mutants of Bcl-x<sub>L</sub> binding Bim or Bad BH3. Methods for obtaining the average and standard deviation for each  $K_i$  value are described in Materials and Methods.**

|                                | <b>Bim-22</b> | <b>Bad-22</b> |
|--------------------------------|---------------|---------------|
| <b>Bcl-x<sub>L</sub></b>       | 3.4±1.4       | 1.8±0.6       |
| <b>RX1</b>                     | >50,000       | 33±5          |
| <b>Bcl-x<sub>L</sub>-Y101H</b> | 10±2          | 25±9          |
| <b>Bcl-x<sub>L</sub>-A104M</b> | 2.3±0.4       | 0.44±0.08     |
| <b>Bcl-x<sub>L</sub>-F105L</b> | 4.6±3.2       | 8.6±3.1       |
| <b>Bcl-x<sub>L</sub>-Q111G</b> | 2.0±0.9       | 11±4          |
| <b>Bcl-x<sub>L</sub>-S122I</b> | 1.3±0.2       | 0.17±0.01     |
| <b>Bcl-x<sub>L</sub>-Q125V</b> | 0.68±0.31     | 0.40±0.24     |
| <b>Bcl-x<sub>L</sub>-V126A</b> | 110±60        | 20±6          |
| <b>Bcl-x<sub>L</sub>-L130I</b> | 27±7          | 38±14         |
| <b>Bcl-x<sub>L</sub>-A142G</b> | 2.7±0.8       | 0.16±0.04     |
| <b>Bcl-x<sub>L</sub>-F146A</b> | 77±19         | 70±30         |

**Table S7. Fitted  $K_i$  values (nM) for point mutants of design RX1 binding Bim or Bad BH3. Methods for obtaining the average and standard deviation for each  $K_i$  value are described in Materials and Methods.**

|                  | <b>Bad-22</b> | <b>Bad-28</b> | <b>Bim-28</b>          | <b>Bad-26</b> | <b>Bim-26</b> |
|------------------|---------------|---------------|------------------------|---------------|---------------|
| <b>RX1</b>       | 33±5          | 0.26±0.07     | 2,300±400 <sup>a</sup> | 0.97±0.18     | 1,400±200     |
| <b>RX1-H101Y</b> | 4.1±1.5       | -             | 200±50 <sup>a</sup>    | -             | 110±30        |
| <b>RX1-L105F</b> | -             | 1.3±0.7       | 1,600±300 <sup>a</sup> | 6.4±1.4       | 850±190       |
| <b>RX1-G111Q</b> | 17±2          | -             | 1,500±200 <sup>a</sup> | -             | 800±70        |
| <b>RX1-I122S</b> | -             | 7.1±2.8       | 3,400±800 <sup>a</sup> | 52±18         | 1,700±600     |
| <b>RX1-V125Q</b> | -             | 4.0±2.7       | >8,000 <sup>a</sup>    | 18±14         | 11,000±4000   |
| <b>RX1-A126V</b> | 34±5          | -             | 310±70                 | -             | 360±90        |
| <b>RX1-I130L</b> | 6.0±1.2       | -             | 290±40 <sup>a</sup>    | -             | 230±60        |
| <b>RX1-G142A</b> | -             | 8.0±5.0       | 440±150                | 34±5          | 500±130       |
| <b>RX1-A146F</b> | 39±2          | -             | 130±10                 | -             | 150±20        |

<sup>a</sup>Limited solubility of Bim-28 at high concentration prevented accurate determination of the lower baseline when fitting dissociation constants. Fitted values were obtained by imposing a lower baseline as described in *SI text*.

**Table S8. Fitted  $K_i$  values (nM) for Bcl-xL and RX1 interacting with different Bad mutants<sup>a</sup>. Methods for obtaining the average and standard deviation for each  $K_i$  value are described in Materials and Methods.**

|                    | <b>Bcl-xL</b> | <b>RX1</b>  |
|--------------------|---------------|-------------|
| <b>Bad-22</b>      | 1.8±0.6       | 33±5        |
| <b>Bad-22-G2eL</b> | >1,000        | >20,000     |
| <b>Bad-22-L3aD</b> | >1,000        | >20,000     |
| <b>Bad-22-S3eL</b> | >1,000        | 4,600±500   |
| <b>Bad-22-D3fK</b> | 330±40        | 5,000±900   |
| <b>Bad-22-F4aE</b> | >1,000        | 5,200±1,200 |

<sup>a</sup> Inhibition did not reach completion even at the highest peptide concentration and fitted values were obtained by imposing a lower baseline as described in *SI text*.

**Table S9. Oligonucleotides introducing randomization**

|                               | <b>Oligonucleotides</b>                                                                                          | <b>Positions randomized</b>     |
|-------------------------------|------------------------------------------------------------------------------------------------------------------|---------------------------------|
| <b>1<sup>st</sup> library</b> | 5'-GCTGTCCCTGGGGTGATGTGCAHCTGGGATGTAVBGTCAC<br>CTGAAMNHCCGCCGAWRCCGAGTTCMAWCTCGTCGCCTG<br>CCTCCCTC-3' (reverse)  | F97, Y101, A104,<br>L108, L112  |
|                               | 5'-CACATCACCCAGGGACAGCATATCAGAGCTTTGAACAG<br>RBKGTGAATRHAVTCTTCCGGGATGGGGTAAACTGG-3'                             | V126, E129, L130                |
|                               | 5'-TTCCGGGATGGGGTAAACTGGGGTTCGCATTGTGRSCTTTT<br>TCTCCTTCGGCGGGGCAC-3'                                            | A142                            |
| <b>2<sup>nd</sup> library</b> | 5'-CTGTCCCTGGGGTGATGTGCAAMNBGGATGTCASGTCAC<br>TGAATGCCCGCCGATRCCGAGTTCAAATHSGTCGCCTGCCTC<br>CCTCAGC-3' (reverse) | E96, Y101, A104,<br>L108, Q111  |
|                               | 5'-CTGTCCCTGGGGTGATGTGCAAMNBGGATGTCASGTCAC<br>TGAACATCCGCCGATRCCGAGTTCAAATHSGTCGCCTGCCTC<br>CCTCAGC-3' (reverse) |                                 |
|                               | 5'-CGACCCAGTTTACACCGTCCCGGAAGAKTWCATTCAC<br>TACADHTTCAAAGDNCTGATATGCTGTCCCTGGGGTGATGTG<br>CAA-3' (reverse)       | S122, Q125, V126,<br>E129, L130 |
|                               | 5'-CGACCCAGTTTACACCGTCCCGGAAGAKTWCATTCAC<br>TACTHSTTCAAAGDNCTGATATGCTGTCCCTGGGGTGATGTG<br>CAA-3' (reverse)       |                                 |
|                               | 5'-CTTCCGGGACGGTGTAAGTGGGGTTCGCATTGTGGGCTTT<br>TTCTCCTTSGGCGGGGCACTGTGCGTGG-3'                                   | F146                            |
|                               | 5'-CTTCCGGGACGGTGTAAGTGGGGTTCGCATTGTGGGCTTT<br>TTCTCCGCTGGCGGGGCACTGTGCGTGG-3'                                   |                                 |
|                               | 5'-CTCTCGGCTGCTGCATTGTCCCGWAGAGTTCACAAAAG<br>TATCCCAGC-3' (reverse)                                              | Y195                            |

Figure S1

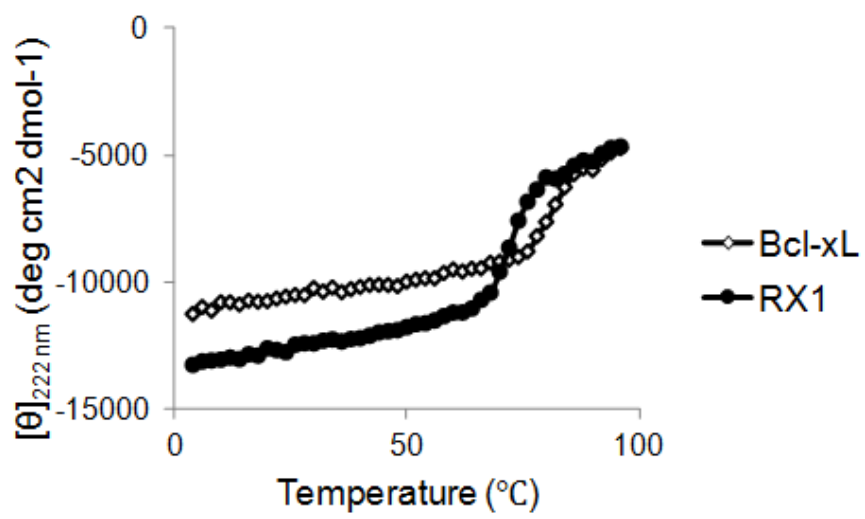

**Figure S2**

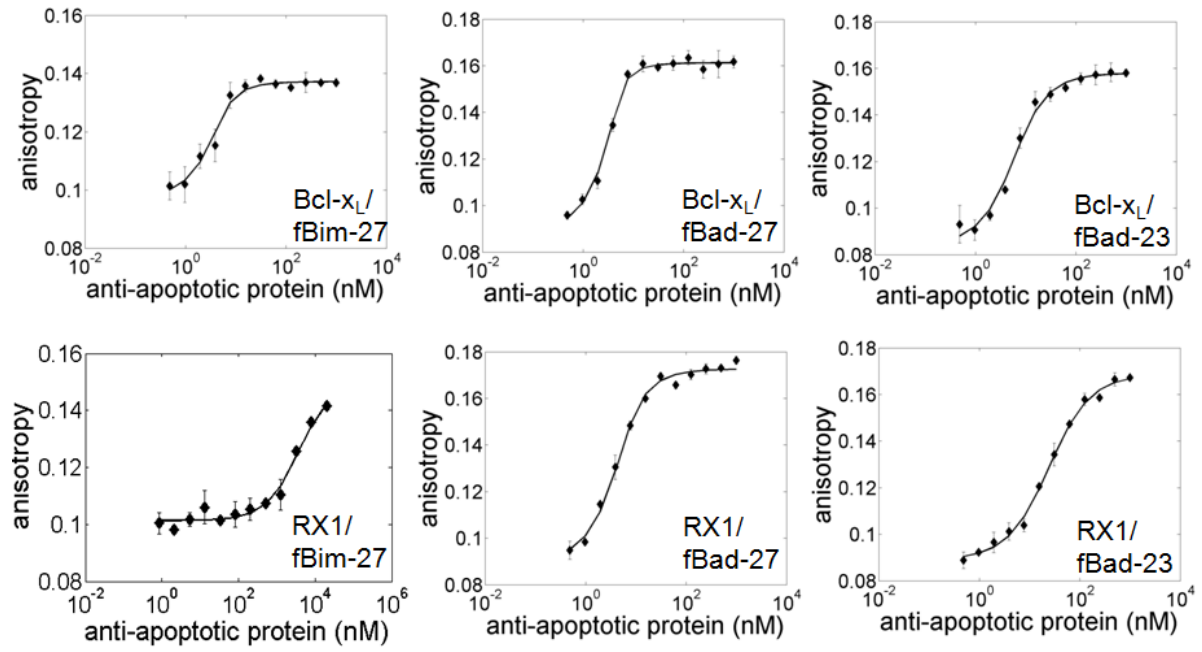

**Figure S3**

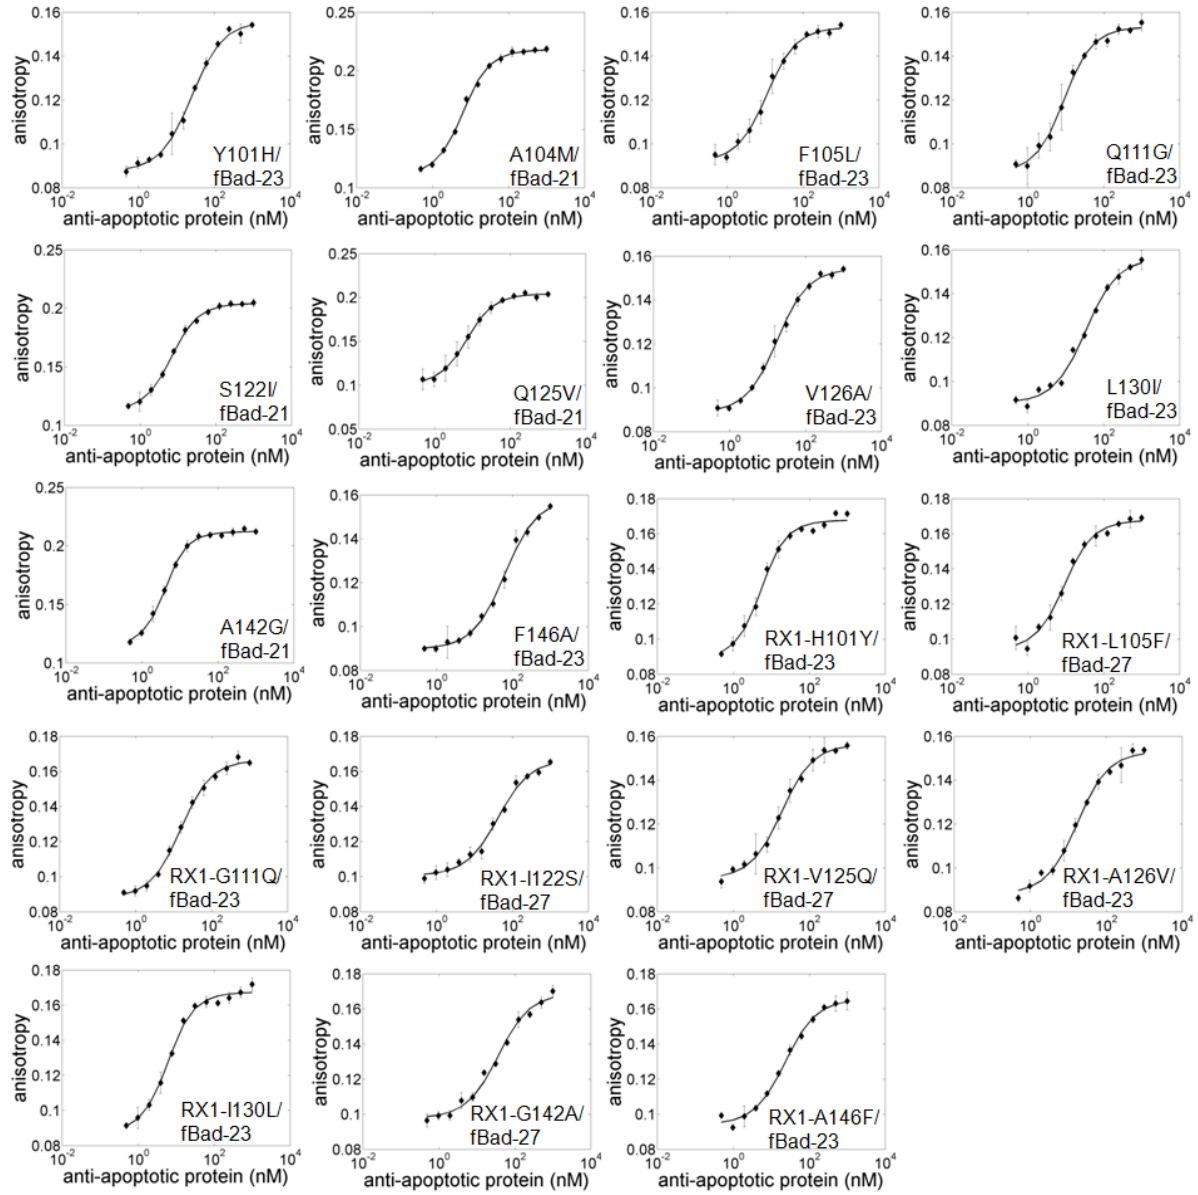

Figure S4

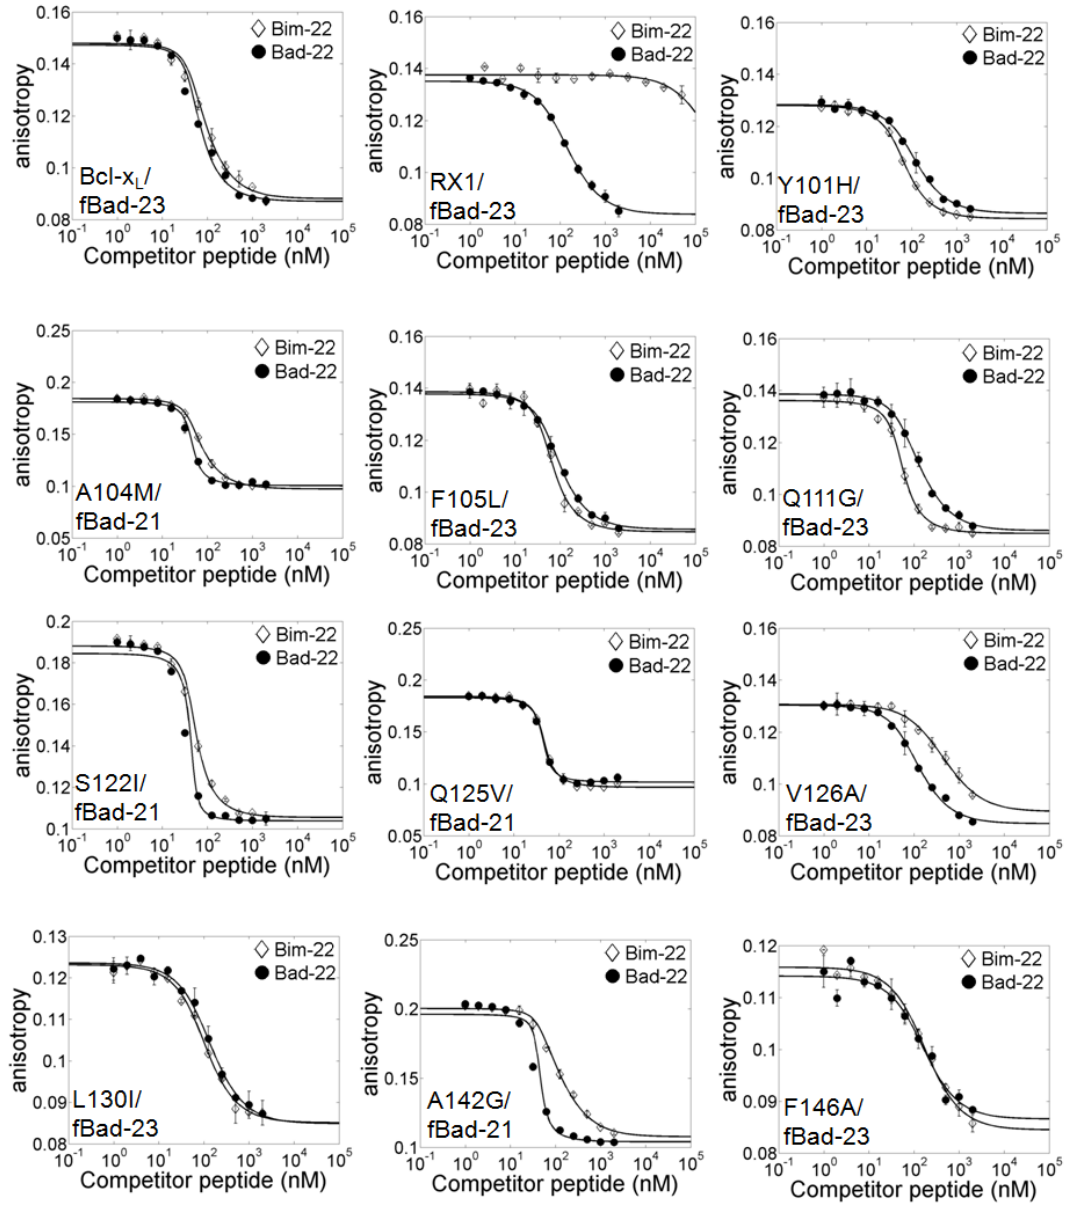



Figure S5

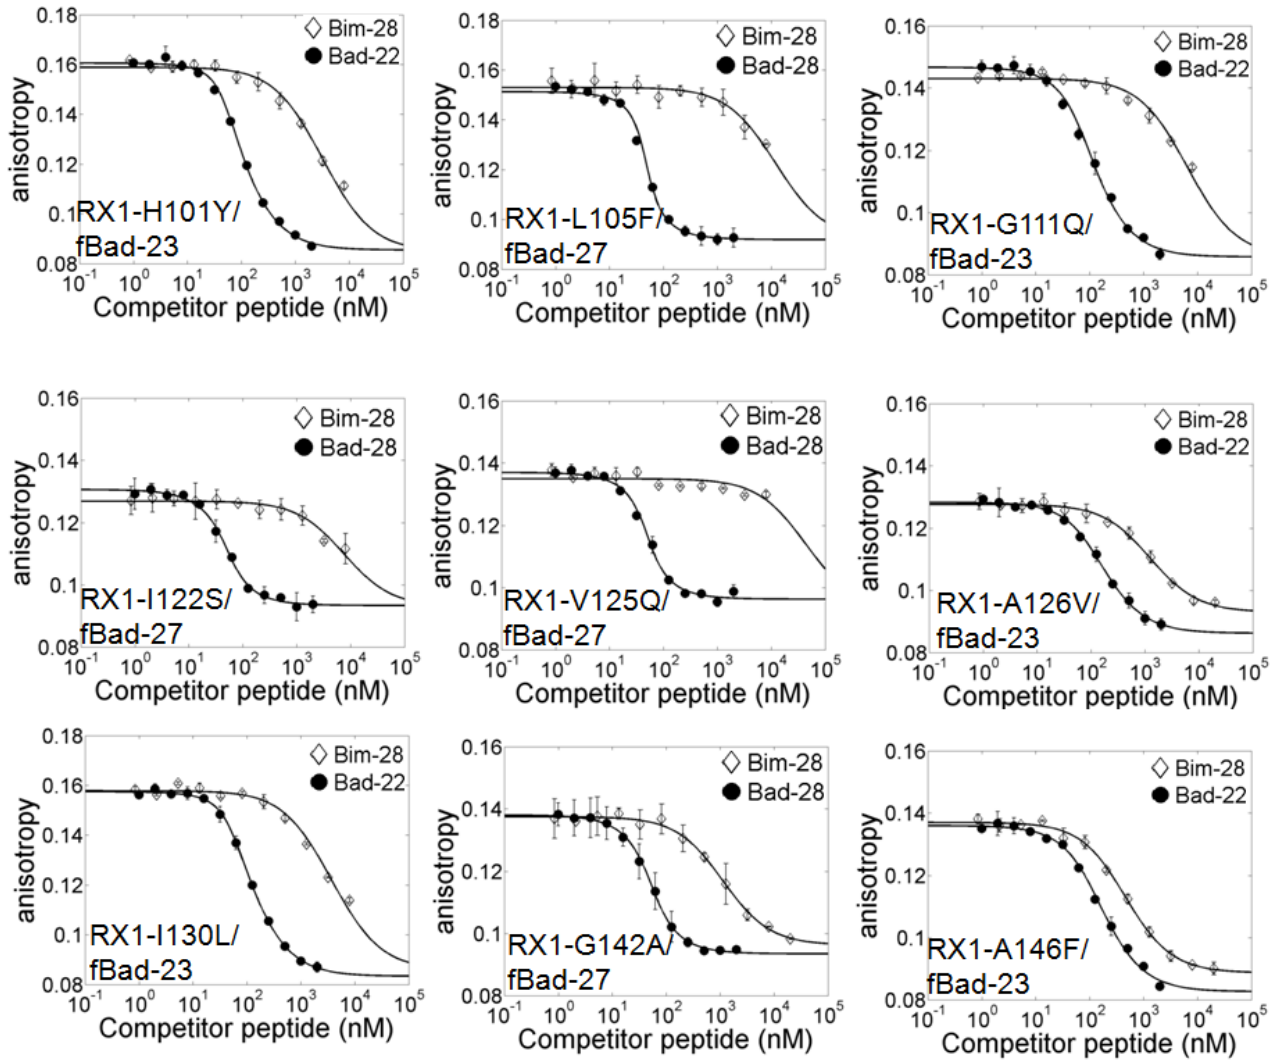

**Figure S6**

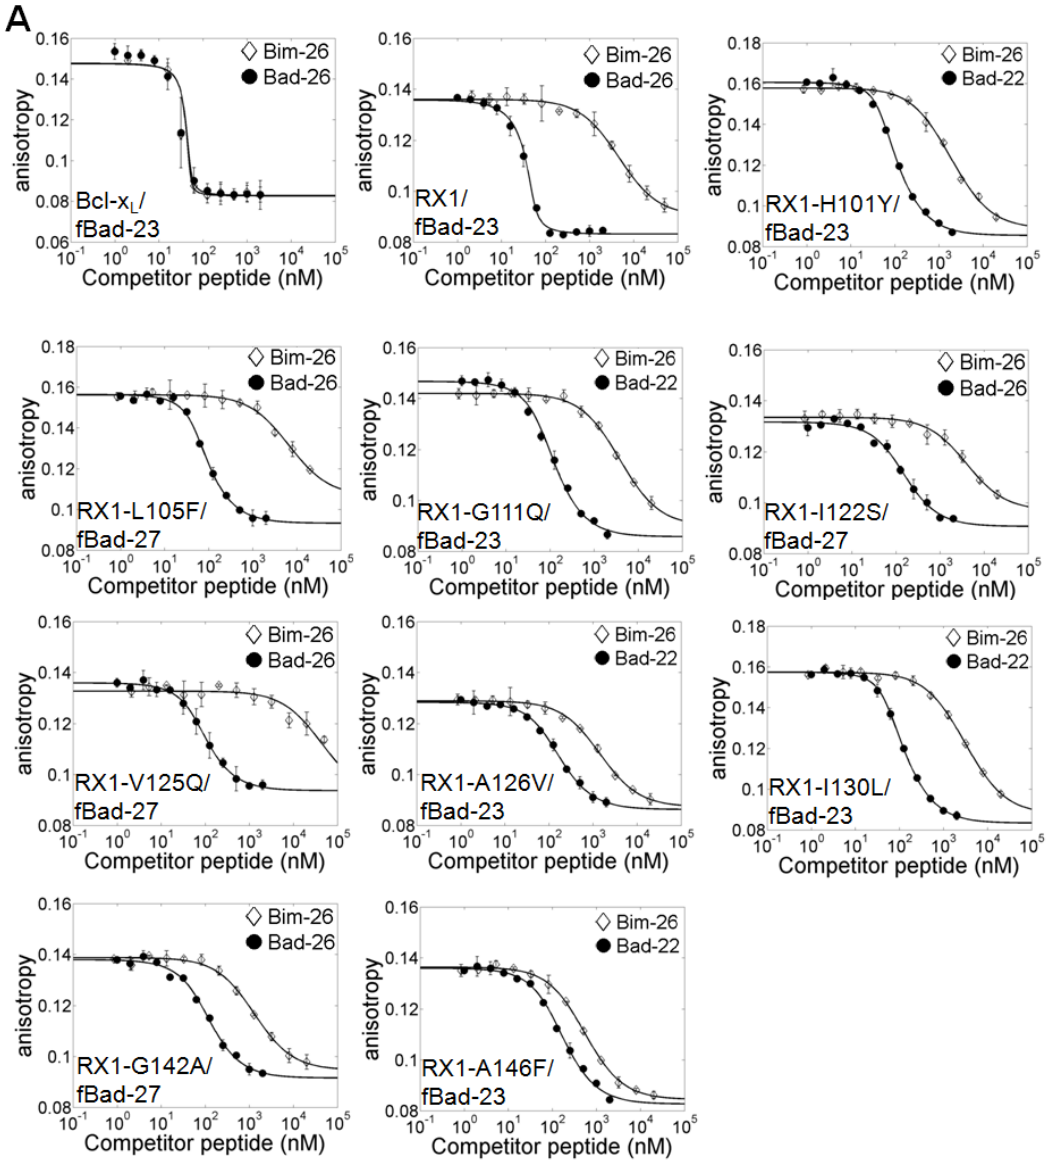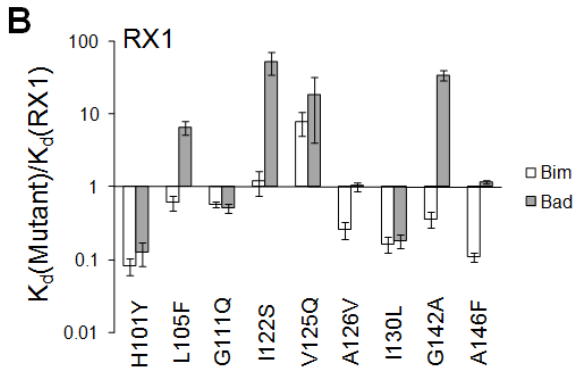



Figure S8

A

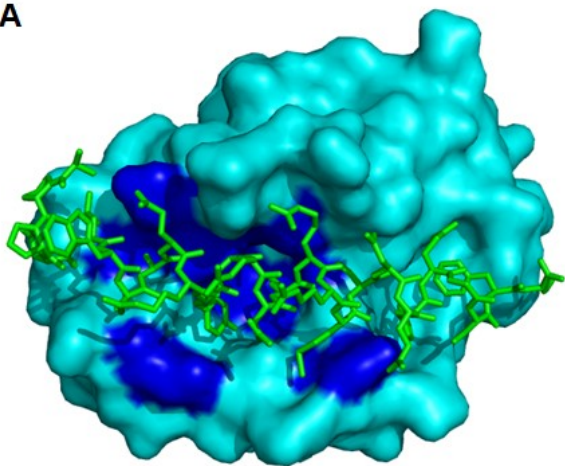

B

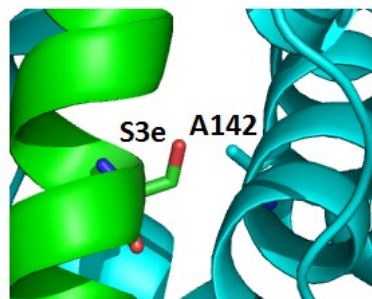

C

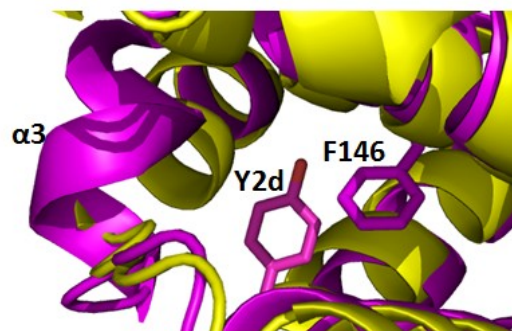

Supplement: NIHMS422171-supplement-01.pdf [file NIHMS422171-supplement-01.pdf]
